# Supplementary material for: Adsorptive removal of ciprofloxacin by ethylene diaminetetraacetic acid/β-cyclodextrin composite from aqueous solution
Source: Royal Society of Chemistry journal article supplement (doi:10.1039/c7nj03770h), 2017-12-27
Supplement: c7nj03770h1.pdf [file c7nj03770h1.pdf]

## Supporting Information

### Adsorptive Removal of Ciprofloxacin by Ethylene Diaminetetraacetic Acid/ $\beta$ -cyclodextrin Composite from Aqueous Solution

Yu Fei<sup>a, c§</sup>, Chen Dexian<sup>a§</sup>, Ma Jie<sup>b, d\*</sup>

<sup>a</sup> *School of Chemical and Environmental Engineering, Shanghai Institute of  
Technology, 100 Hai Quan Road, Shanghai 201418, P.R. China*

<sup>b</sup> *Shanghai Institute of Pollution Control and Ecological Security, Shanghai, 200092,  
P.R. China*

<sup>c</sup> *College of Ecology and Environment, Shanghai Ocean University, Shanghai 201306,  
P.R. China*

<sup>d</sup> *Key Laboratory of Yangtze River Water Environment, College of  
Environmental Science and Engineering, Tongji University, 1239 Siping Road,  
Shanghai 200092, P.R. China*

## 1. Adsorption kinetic models

The pseudo-first-order model is as follows:

$$\log(q_e - q_t) = \log q_e - k_1 t$$

where  $q_t$  and  $q_e$  (mg/g) are the amount of CPX adsorbed per unit mass of adsorbent at any time  $t$  (min) and equilibrium, respectively.  $k_1$  ( $\text{min}^{-1}$ ) is the rate constant of pseudo-first-order model.

The pseudo-second-order kinetic model is as follows:

$$\frac{t}{q_t} = \frac{1}{k_2 q_e^2} + \frac{1}{q_e} t$$

where  $k_2$  (g/mg min) is the rate constant of pseudo-second-order model.

## 2. Adsorption isotherm models

The nonlinear forms of Langmuir and Freundlich models were expressed as follows:

$$q_e = \frac{q_m k_l c_e}{1 + k_l c_e}$$
$$q_e = K_f + C_e^{\frac{1}{n}}$$

where  $C_e$  and  $q_e$  are the concentrations of adsorbate in water and the amount of adsorbate adsorbed to adsorbent when the adsorption equilibrium is reached, respectively.  $q_m$  is the maximum adsorption capacity, and  $K_l$  is Langmuir constant (L/mg) related to the energy of adsorption and the affinity of the binding sites. Moreover,  $K_f$  are Freundlich constant, also known as capacity factor related to adsorption capacity  $((\text{mg g}^{-1})(\text{L mg}^{-1})^{1/n})$ .  $1/n$  related to adsorption intensity, which is a dimensionless empirical parameter.

In order to adequately study the adsorption mechanisms, the linear Dubinin Radushkevich (D-R) isotherm model was chosen and exhibited as follows:

$$\ln q_e = \ln q_m - B \varepsilon^2$$

where  $B$  is a constant related to the mean free energy of adsorption ( $\text{mol}^2 \text{kJ}^{-2}$ ),  $q_m$  is the theoretical saturation capacity ( $\text{mg g}^{-1}$ ), and  $\varepsilon$  is the Polanyi value, which can be calculated from eq 7:

$$\varepsilon = RT \ln\left(1 + \frac{1}{c_e}\right)$$

where R (J mol<sup>-1</sup> K<sup>-1</sup>) is thermal equilibrium constant and T(K) is the absolute temperature.
